# Supplementary material for: Perceptions and Knowledge towards COVID-19 Vaccine Hesitancy among a Subpopulation of Adults in Kenya: An English Survey at Six Healthcare Facilities
Source: MDPI journal article supplement (doi:10.3390/vaccines10050705), 2022-04-29
Supplement: s1 [file s1]

## Supplementary Appendix

| Demographics                                                                                |                                                                                                                                                                                                                                                                                                    |
|---------------------------------------------------------------------------------------------|----------------------------------------------------------------------------------------------------------------------------------------------------------------------------------------------------------------------------------------------------------------------------------------------------|
| Study Site                                                                                  |                                                                                                                                                                                                                                                                                                    |
| Gender                                                                                      | <input type="checkbox"/> Male <input type="checkbox"/> Female                                                                                                                                                                                                                                      |
| Current Age (years)                                                                         | -----                                                                                                                                                                                                                                                                                              |
| Marital status                                                                              | <input type="checkbox"/> Single <input type="checkbox"/> Married <input type="checkbox"/> Others                                                                                                                                                                                                   |
| Education (Degree)                                                                          | <input type="checkbox"/> None <input type="checkbox"/> School education <input type="checkbox"/> Diploma<br><input type="checkbox"/> Undergraduate <input type="checkbox"/> Postgraduate                                                                                                           |
| Employment                                                                                  | <input type="checkbox"/> Employed <input type="checkbox"/> Unemployed <input type="checkbox"/> Retired                                                                                                                                                                                             |
| Nationality                                                                                 | <input type="checkbox"/> Kenyan <input type="checkbox"/> Non-Kenyan                                                                                                                                                                                                                                |
| Race                                                                                        | <input type="checkbox"/> African <input type="checkbox"/> Asian<br><input type="checkbox"/> Caucasian <input type="checkbox"/> Others Specify -----                                                                                                                                                |
| Medical History                                                                             |                                                                                                                                                                                                                                                                                                    |
| What medical conditions do you currently have                                               | <input type="checkbox"/> None <input type="checkbox"/> Diabetes<br><input type="checkbox"/> HTN <input type="checkbox"/> High Cholesterol<br><input type="checkbox"/> Heart Disease <input type="checkbox"/> HIV<br><input type="checkbox"/> Stroke <input type="checkbox"/> Others Specify: ----- |
| Attitudes towards Vaccines and Immunization                                                 |                                                                                                                                                                                                                                                                                                    |
| In general, vaccines are safe.                                                              | <input type="checkbox"/> Strongly agree <input type="checkbox"/> Agree <input type="checkbox"/> Neutral<br><input type="checkbox"/> Disagree <input type="checkbox"/> Strongly disagree                                                                                                            |
| COVID-19 Pandemic                                                                           |                                                                                                                                                                                                                                                                                                    |
| Who of the following tested positive for COVID-19?                                          | <input type="checkbox"/> Myself<br><input type="checkbox"/> A family member<br><input type="checkbox"/> A friend<br><input type="checkbox"/> Colleague<br><input type="checkbox"/> A neighbor<br><input type="checkbox"/> No one                                                                   |
| Do you think that you may have been exposed to or infected with COVID-19 (without testing)? | <input type="checkbox"/> Yes <input type="checkbox"/> No                                                                                                                                                                                                                                           |
| What are you most worried about during this COVID-19 pandemic? (Tick not more than 5)       | <input type="checkbox"/> Fear of becoming infected myself<br><input type="checkbox"/> Fear of a family member becoming infected                                                                                                                                                                    |

|                                                                                                                       |                                                                                                                                                                                                                                                                                                                                                                                                                                                                                                                                         |
|-----------------------------------------------------------------------------------------------------------------------|-----------------------------------------------------------------------------------------------------------------------------------------------------------------------------------------------------------------------------------------------------------------------------------------------------------------------------------------------------------------------------------------------------------------------------------------------------------------------------------------------------------------------------------------|
|                                                                                                                       | <input type="checkbox"/> Death<br><input type="checkbox"/> Financial related worries<br><input type="checkbox"/> Job-related worries<br><input type="checkbox"/> Food insecurity related worries<br><input type="checkbox"/> Unavailability of vaccines<br><input type="checkbox"/> Being a plot or conspiracy<br><input type="checkbox"/> Being forced to take a medication<br><input type="checkbox"/> Being forced to take a vaccine<br><input type="checkbox"/> I am not worried about any issues<br><input type="checkbox"/> Other |
| <b>Have you received the COVID-19 Vaccine?</b>                                                                        | <input type="checkbox"/> Yes <input type="checkbox"/> No                                                                                                                                                                                                                                                                                                                                                                                                                                                                                |
| <b>Which vaccine did you receive?</b>                                                                                 | <input type="checkbox"/> Pfizer <input type="checkbox"/> AstraZeneca/Covishield <input type="checkbox"/> Moderna<br><input type="checkbox"/> Sputnik <input type="checkbox"/> Johnson & Johnson <input type="checkbox"/> Others -----                                                                                                                                                                                                                                                                                                   |
| <b>How many doses of the vaccine did you receive?</b>                                                                 | <input type="checkbox"/> 1 <input type="checkbox"/> 2 <input type="checkbox"/> Other                                                                                                                                                                                                                                                                                                                                                                                                                                                    |
| <b>Perspectives Toward COVID-19 Vaccination</b>                                                                       |                                                                                                                                                                                                                                                                                                                                                                                                                                                                                                                                         |
| <b>Do you think it is important to get a vaccine to protect the people from COVID-19?</b>                             | <input type="checkbox"/> Strongly agree <input type="checkbox"/> Agree <input type="checkbox"/> Neutral<br><input type="checkbox"/> Disagree <input type="checkbox"/> Strongly disagree                                                                                                                                                                                                                                                                                                                                                 |
| <b>Pharmaceutical companies are going to develop safe and effective COVID-19 vaccines?</b>                            | <input type="checkbox"/> Strongly agree <input type="checkbox"/> Agree <input type="checkbox"/> Neutral<br><input type="checkbox"/> Disagree <input type="checkbox"/> Strongly disagree                                                                                                                                                                                                                                                                                                                                                 |
| <b>Do you believe COVID-19 vaccines made in Europe or America are safer than those made in other world countries?</b> | <input type="checkbox"/> Strongly agree <input type="checkbox"/> Agree <input type="checkbox"/> Neutral<br><input type="checkbox"/> Disagree <input type="checkbox"/> Strongly disagree                                                                                                                                                                                                                                                                                                                                                 |
| <b>Which of the following COVID-19 vaccine do you prefer to use in the future?</b>                                    | <input type="checkbox"/> Pfizer <input type="checkbox"/> AstraZeneca/Covishield <input type="checkbox"/> Moderna<br><input type="checkbox"/> Sputnik <input type="checkbox"/> Johnson & Johnson <input type="checkbox"/> Others -----<br><input type="checkbox"/> None                                                                                                                                                                                                                                                                  |
| <b>I would take a vaccine to protect against COVID-19</b>                                                             | <input type="checkbox"/> Strongly agree <input type="checkbox"/> Agree <input type="checkbox"/> Neutral<br><input type="checkbox"/> Disagree <input type="checkbox"/> Strongly disagree                                                                                                                                                                                                                                                                                                                                                 |
| <b>I am hesitant to take the vaccine due to side effects from the vaccine.</b>                                        | <input type="checkbox"/> Strongly agree <input type="checkbox"/> Agree <input type="checkbox"/> Neutral<br><input type="checkbox"/> Disagree <input type="checkbox"/> Strongly disagree                                                                                                                                                                                                                                                                                                                                                 |
| <b>What side effects worry you the most about taking the COVID-19 vaccine?</b>                                        |                                                                                                                                                                                                                                                                                                                                                                                                                                                                                                                                         |
| <b>I will recommend my family and friends to get vaccinated against the COVID-19 vaccine?</b>                         | <input type="checkbox"/> Strongly agree <input type="checkbox"/> Agree <input type="checkbox"/> Neutral<br><input type="checkbox"/> Disagree <input type="checkbox"/> Strongly disagree                                                                                                                                                                                                                                                                                                                                                 |
| <b>I will get my children vaccinated against the COVID-19 vaccine?</b>                                                | <input type="checkbox"/> Strongly agree <input type="checkbox"/> Agree <input type="checkbox"/> Neutral<br><input type="checkbox"/> Disagree <input type="checkbox"/> Strongly disagree                                                                                                                                                                                                                                                                                                                                                 |

|                                                                                    |                                                                                                                                                                                                                                                                                                                                                                                                                                                                                                                       |
|------------------------------------------------------------------------------------|-----------------------------------------------------------------------------------------------------------------------------------------------------------------------------------------------------------------------------------------------------------------------------------------------------------------------------------------------------------------------------------------------------------------------------------------------------------------------------------------------------------------------|
| <b>COVID-19 vaccine maybe faulty or fake</b>                                       | <input type="checkbox"/> Strongly agree <input type="checkbox"/> Agree <input type="checkbox"/> Neutral<br><input type="checkbox"/> Disagree <input type="checkbox"/> Strongly disagree                                                                                                                                                                                                                                                                                                                               |
| <b>COVID-19 vaccine was rapidly developed and approved</b>                         | <input type="checkbox"/> Strongly agree <input type="checkbox"/> Agree <input type="checkbox"/> Neutral<br><input type="checkbox"/> Disagree <input type="checkbox"/> Strongly disagree                                                                                                                                                                                                                                                                                                                               |
| <b>COVID-19 vaccine might have some medical complications in the future.</b>       | <input type="checkbox"/> Strongly agree <input type="checkbox"/> Agree <input type="checkbox"/> Neutral<br><input type="checkbox"/> Disagree <input type="checkbox"/> Strongly disagree                                                                                                                                                                                                                                                                                                                               |
| <b>COVID-19 vaccine is being promoted for commercial gain</b>                      | <input type="checkbox"/> Strongly agree <input type="checkbox"/> Agree <input type="checkbox"/> Neutral<br><input type="checkbox"/> Disagree <input type="checkbox"/> Strongly disagree                                                                                                                                                                                                                                                                                                                               |
| <b>The government should make the vaccine available for all citizens for free?</b> | <input type="checkbox"/> Strongly agree <input type="checkbox"/> Agree <input type="checkbox"/> Neutral<br><input type="checkbox"/> Disagree <input type="checkbox"/> Strongly disagree                                                                                                                                                                                                                                                                                                                               |
| <b>Would you be willing to pay for a COVID-19 vaccine privately?</b>               | <input type="checkbox"/> Yes <input type="checkbox"/> No <input type="checkbox"/> Not sure                                                                                                                                                                                                                                                                                                                                                                                                                            |
| <b>Who do you trust the most for information about vaccines?</b>                   | <input type="checkbox"/> Media (TV, Radio, Newspaper)<br><input type="checkbox"/> Internet<br><input type="checkbox"/> Social media (Facebook, Twitter, WhatsApp etc.)<br><input type="checkbox"/> Health care providers: Physicians, pharmacists, etc.<br><input type="checkbox"/> Family-members<br><input type="checkbox"/> Government (JFDA)<br><input type="checkbox"/> The pharmaceutical company reports<br><input type="checkbox"/> Scientific articles<br><input type="checkbox"/> I do not trust any source |
